# Supplementary material for: A Comparative Study of Variables Influencing Ischemic Injury in the Longa and Koizumi Methods of Intraluminal Filament Middle Cerebral Artery Occlusion in Mice
Source: PLOS journal article supplement (doi:10.1371/journal.pone.0148503), 2016-02-12
Supplement: S5 (10.1371/journal.pone.0148503.s005) [file journal.pone.0148503.s005]

**Supplementary Table 3. The position of origin for occipital and superior thyroid arteries, in C57BL/6 mice used in this study**

| Artery Position | Occipital Artery | Superior Thyroid Artery |
|-----------------|------------------|-------------------------|
| ICA             | 184/310 (66.5%)  | 21/310 (6.8%)           |
| ECA             | 31/310 (10%)     | 283/310 (91.3%)         |
| Bifurcation     | 73/310 (23.5%)   | 6/310 (1.9%)            |
