# Supplementary material for: A Comparative Study of Variables Influencing Ischemic Injury in the Longa and Koizumi Methods of Intraluminal Filament Middle Cerebral Artery Occlusion in Mice
Source: PLoS One. 2016 Feb 12;11(2):e0148503. doi: 10.1371/journal.pone.0148503 (PMC4752454; doi:10.1371/journal.pone.0148503)
Supplement: S8 Table — (XLSX) [file pone.0148503.s010.xlsx]

## Sheet: Sheet1
Raw data for Figure 3
30 min, 4h, 12h, 24h recovery
Suture	Occlusion Time	Recovery Time	Mouse #	Lesion	Average Lesion	Std Error of the Mean	Pre CCA (Arbitrary Units)	Post CCA (Arbitrary Units)	Pre MCAO (Arbitrary Units)	Immediately Post MCAO (Arbitrary Units)	Immediately Pre Reperfusion (Arbitrary Units)	Last measured reperf at least 5 min Post Reperfusion (Arbitrary Units)	CBF Drop over time (Fold Change)	CCA Drop (%)	MCAO Drop vs. Pre CCA (%)	Ratio of MCAO drop	Ratio of Increase after MCA Reperfusion (5min post/Immediately pre reperfusion)	Reperfusion based on decreased and increased ratios	>5 min Reperfusion from initial MCAO drop (via the traditional % based method)	Average CCA Drop (%)	STD Error	Average MCAO Drop (%)	STD Error	Average MCA Reperfusion based on ratios	STD Error	Average MCA Reperfusion (Traditional Method) %	STD Error	Average CBF Drop Over Time (Ratio)	STD Error	Start Weight	End Weight	Weight Loss	Average Weight (Start)	STD Error	Average Weight Loss (% Original Body Weight)	Average Weight Loss (% Original Body Weight)	STD Error	Behaviour	Average Behaviour	STD Error	Age at Surgery (days)	Average Age at Surgery	STD Error
Thin	0 min	30 min	86699	-0.573477	-0.23279	0.452928	157	101	122	45	45	111	1	35.6688	71.3376	2.71111	2.46667	0.909836	85.7143	30.4138	2.90227	76.4866	4.46364	0.94872	0.0234772	92.1857	3.8123	1	0	21.7	*	*	23.0333	0.726483				N/A			69	69	0
	0 min	30 min	86710	0.664452			889	623	774	130	130	767	1	29.9213	85.3768	5.95385	5.9	0.990956	98.913											24.2	*	*						N/A			69
	0 min	30 min	86709	-0.789344			499	371	421	136	136	398	1	25.6513	72.7455	3.09559	2.92647	0.945368	91.9298											23.2	*	*						N/A			69
	60 min	30 min	81136	36.3023	44.6308	3.43248	501	400	480	118	13.6	225	8.67647	20.1597	76.4471	4.0678	16.5441	4.0671	58.3978	29.6082	2.41361	78.4182	1.79071	1.57805	0.574039	38.3509	6.6239	3.87366	1.15651	24.6	*	*	25.9	1.05875				N/A			76	76.4286	2.43836
	60 min	30 min	81243	36.7975			577	384	508	150	68	218	2.20588	33.4489	74.0035	3.38667	3.20588	0.946619	41.8994											22.7	*	*						N/A			76
	60 min	30 min	81084	58.8476			750	500	750	150	60	120	2.5	33.3333	80	5	2	0.4	10											25.8	*	*						N/A			77
	60 min	30 min	81086	39.4724			902	674	753	199	174	416	1.14368	25.2772	77.9379	3.78392	2.3908	0.631833	43.6823											30.6	*	*						N/A			80
	60 min	30 min	81099	55.8435			800	600	800	100	37	308	2.7027	25	87.5	8	8.32432	1.04054	38.7143											27.9	*	*						N/A			80
	60 min	30 min	86708	43.3572			998	686	993	265	33.6	435	7.8869	31.2625	73.4469	3.74717	12.9464	3.45499	55.1374											23	*	*						N/A			63
	60 min	30 min	83928	41.795			147	90	190	30	15	48	2	38.7755	79.5918	6.33333	3.2	0.505263	20.625											26.7	26.3	0.4						N/A			83
	0 min	4h	80337	0.0239636	-0.0904197	0.804629	334	258	291	29.4	29.4	322	1	22.7545	91.1976	9.89796	10.9524	1.10653	111.85	44.4849	10.8751	81.8172	5.03104	1.06811	0.0229891	108.164	2.40073	1	0	23.2	22.9	0.3	24.6	1.02632	1.2931	2.82243	0.834673	0	0	0	81	81	0
	0 min	4h	80349	1.24252			853	374	851	222	222	874	1	56.1547	73.9742	3.83333	3.93694	1.02703	103.657											26.6	25.8	0.8			3.00752			0			81
	0 min	4h	80336	-1.53774			715	325	664	141	141	711	1	54.5455	80.2797	4.70922	5.04255	1.07078	108.987											24	23	1			4.16667			0			81
	60 min	4h	66659	26.7558	37.2635	5.2735	163.6	121.1	138	19.8	18.8	187.1	1.05319	25.978	87.8973	6.9697	9.95213	1.42791	142.386	26.1604	4.74332	82.0004	1.65646	0.869935	0.135637	55.4114	14.452	1.72569	0.23965	22.8	22.4	0.4	24.9875	0.654227	1.75439	2.16496	0.310195	4	3.625	0.460493	61	71.375	4.07053
	60 min	4h	65860	33.7056			160	119	162	44	42	121	1.04762	25.625	72.5	3.68182	2.88095	0.782481	66.9492											27.6	27.3	0.3			1.08696			1			67
	60 min	4h	66640	23.7713			295.3	215.9	278.5	44.7	31	91.9	1.44194	26.8879	84.8629	6.23043	2.96452	0.475813	26.0479											24.1	23.6	0.5			2.07469			4			65
	60 min	4h	66641	58.4337			392	257.3	318.5	79.5	25.7	54.6	3.09339	34.3622	79.7194	4.00629	2.12451	0.530295	12.0921											23.8	23.3	0.5			2.10084			5			65
	60 min	4h	66689	46.2698			622.4	521.3	588.6	101.1	62.2	286.7	1.6254	16.2436	83.7564	5.82196	4.60932	0.791714	46.0513											25.9	*	*			*			3			67
	60 min	4h	66707	46.25			936.5	903.5	919.9	185	94.1	598.4	1.96599	3.52376	80.2456	4.97243	6.35919	1.27889	68.6216											23.9	23.4	0.5			2.09205			3			67
	60 min	4h	78033	14.5072			447	329	425	67	31	236	2.16129	26.3982	85.0112	6.34328	7.6129	1.20015	57.2626											24.1	23.6	0.5			2.07469			4			86
	60 min	4h	82509	48.4144			189	94	168	34	24	56	1.41667	50.2646	82.0106	4.94118	2.33333	0.472222	23.8806											27.7	26.6	1.1			3.97112			5			93
	0 min	12h	66671	-2.48531	0.123785	0.888482	*	*	*	*	*	*	*	*	*	*	*	*	*	31.9998	2.37744	77.8153	1.16096	1.0697	0.00155007	109.282	0.136593	1	0	23.3	22.5	0.8	25.475	1.21269	3.43348	4.38762	0.965605	0	0	0	60	66	2.44949
	0 min	12h	81865	1.49929			356	226	300	78	78	320	1	36.5169	78.0899	3.84615	4.10256	1.06667	109.009											28.9	26.8	2.1			7.26644			0			64
	0 min	12h	86784	0.819672			246	176	209	50	50	224	1	28.4553	79.6748	4.18	4.48	1.07177	109.434											25.3	24.5	0.8			3.16206			0			70
	0 min	12h	86780	0.661496			477	329	467	116	116	500	1	31.0273	75.6813	4.02586	4.31034	1.07066	109.402											24.4	23.5	0.9			3.68852			0			70
	60 min	12h	66696	33.9443	23.7864	4.80635	324.4	249.6	307.2	52.9	31.5	61.8	1.67937	23.058	83.693	5.80718	1.9619	0.337841	11.9151	23.2308	0.574146	79.0944	3.72571	0.895763	0.169678	48.249	10.4191	1.81268	0.311175	26.3	24.5	1.8	24.2833	0.608505	6.84411	5.57568	0.670013	1	2.66667	0.421637	67	68.5	3.62169
	60 min	12h	66679	10.8072			307.3	235.9	266.9	79.4	25	81	3.176	23.2346	74.1621	3.36146	3.24	0.963867	29.8667											22	21.3	0.7			3.18182			4			75
	60 min	12h	66622	19.0623			878.2	688	909	325	342.6	589.7	0.948628	21.6579	62.9925	2.79692	1.72125	0.615408	42.3116											25.5	24.1	1.4			5.4902			3			76
	60 min	12h	66629	35.5238			514	381.6	437.5	61.3	29.8	335.5	2.05705	25.7588	88.0739	7.13703	11.2584	1.57746	81.26											24	22.1	1.9			7.91667			2			77
	60 min	12h	68589	32.927			521.3	405.3	502.6	82.9	50.5	282.6	1.64158	22.2521	84.0974	6.06273	5.59604	0.923024	55.3014											23.8	22.6	1.2			5.04202			3			58
	60 min	12h	68609	10.4539			426.5	326.6	373.3	78.7	57.3	260.1	1.37347	23.4232	81.5475	4.74333	4.53927	0.956979	68.8391											24.1	22.9	1.2			4.97925			3			58
	0 min	24h	77658	-0.116904	-0.234272	0.15452	517	363	594	91	91	641	1	29.7872	82.3985	6.52747	7.04396	1.07912	109.344	34.1437	2.20535	81.0716	3.0984	1.03681	0.0220924	104.501	2.57845	1	0	25.2	23.5	1.7	24.8333	0.202759	6.74603	6.16134	1.30086	0	0	0	93	93	0
	0 min	24h	77659	-0.0453721			753	475	713	187	187	732	1	36.919	75.166	3.81283	3.91444	1.02665	103.612											24.5	23.6	0.9			3.67347			0			93
	0 min	24h	77594	-0.540541			669	430	646	96	96	649	1	35.725	85.6502	6.72917	6.76042	1.00464	100.545											24.8	22.8	2			8.06452			0			93
	60 min	24h	65349	52.5391	39.618	3.41748	290.1	164.3	247.7	38.2	16.9	53	2.26036	43.3644	86.8321	6.48429	3.13609	0.483645	17.2315	28.5392	3.9331	72.5617	6.94174	0.809474	0.151987	49.6817	13.942	1.58514	0.233841	22.4	20.2	2.2	24.5667	0.872035	9.82143	10.2866	0.67708	3	3.16667	0.12195	61	67.1667	4.15064
	60 min	24h	65350	36.5514			236	175.1	230	41.6	31.8	161	1.30818	25.8051	82.3729	5.52885	5.06289	0.915723	68.5775											22.3	19.7	2.6			11.6592			3			61
	60 min	24h	65342	29.3632			126	88	121	76	113	134	0.672566	30.1587	39.6825	1.59211	1.18584	0.744826	46.6667											25.6	22.5	3.1			12.1094			3			61
	60 min	24h	65383	39.3548			126.1	89.3	103.8	25.6	12.2	16.3	2.09836	29.1832	79.6987	4.05469	1.33607	0.329511	5.24297											23.8	21.7	2.1			8.82353			3			61
	60 min	24h	66684	45.8049			444.4	385.4	422.3	129.3	77.8	263	1.66195	13.2763	70.9046	3.26605	3.38046	1.03503	63.2082											27.8	*	*			*			5			74
	60 min	24h	82283	34.0945			995	702	945	240	159	844	1.50943	29.4472	75.8794	3.9375	5.30818	1.34811	97.1631											25.5	23.2	2.3			9.01961			2			85
Thick	0 min	30 min	86779	-0.094451	-0.359323	0.347759	668	351	323	128	128	322	1	47.4551	80.8383	2.52344	2.51562	0.996904	99.4872	29.1282	10.2786	77.8244	2.33199	1.01272	0.0142935	101.747	2.00902	1	0	24.7	*	*	24.3667	0.437163	*			N/A			70	70.6667	0.333333
	0 min	30 min	86695	0.065189			949	683	897	254	254	934	1	28.0295	73.235	3.5315	3.67717	1.04125	105.754											24.9	*	*			*			N/A			71
	0 min	30 min	86694	-1.04871			1000	881	1000	206	206	1000	1	11.9	79.4	4.85437	4.85437	1	100											23.5	*	*			*			N/A			71
	60 min	30 min	80636	29.8098	32.5146	4.82561	500	180	500	80	10.5	157.1	7.61905	64	84	6.25	14.9619	2.3939	34.9048	33.3562	5.3519	75.4818	3.72687	1.10383	0.254626	42.6869	5.93701	2.73362	0.874031	24.3	23.8	0.5	25.9143	0.336953	2.05761	0.455538	0.552381	N/A			76	72	2.59119
	60 min	30 min	80648	33.3659			862	601	931	243	105	526	2.31429	30.2784	71.8097	3.83128	5.00952	1.30753	61.1919											26.1	25.8	0.3			1.14943			N/A			76
	60 min	30 min	81203	27.9791			73	54	62	32	56	74	0.571429	26.0274	56.1644	1.9375	1.32143	0.682028	60											25.8	26.2	-0.4			-1.55039			N/A			75
	60 min	30 min	80966	50.217			473	345	493	112	88	220	1.27273	27.0613	76.3214	4.40179	2.5	0.567951	34.6457											26.3	*	*			*			N/A			77
	60 min	30 min	81100	29.1886			617	482	554	161	88	265	1.82955	21.8801	73.906	3.44099	3.01136	0.875144	45.0382											25.3	25.5	-0.2			-0.790514			N/A			76
	60 min	30 min	82380	11.3004			674	433	684	103	32	303	3.21875	35.7567	84.7181	6.64078	9.46875	1.42585	46.6437											26.9	26.7	0.2			0.743494			N/A			62
	60 min	30 min	82302	45.7411			523	374	628	97	42	129	2.30952	28.4895	81.4532	6.47423	3.07143	0.474409	16.3842											26.7	26.4	0.3			1.1236			N/A			62
	0 min	4h	80634	-0.531016	0.0199192	0.90296	558	337	389	125	125	436	1	39.6057	77.5986	3.112	3.488	1.12082	117.803	39.8324	1.48487	83.3934	3.75152	1.0371	0.0437215	105.503	6.32982	1	0	26.7	25.6	1.1	26.3	0.556776	4.11985	3.68369	0.363011	0	0	0	76	77.3333	1.33333
	0 min	4h	80635	1.7848			741	426	585	71	71	595	1	42.5101	90.4184	8.23944	8.38028	1.01709	101.946											25.2	24.2	1			3.96825			0			76
	0 min	4h	80343	-1.19403			527	330	526	94	94	512	1	37.3814	82.1632	5.59574	5.44681	0.973384	96.7593											27	26.2	0.8			2.96296			0			80
	60 min	4h	70817	33.0449	33.6169	3.19304	369	276	350	56	23	102	2.43478	25.2033	84.8238	6.25	4.43478	0.709565	26.8707	22.7836	3.66964	74.4303	3.40333	0.642403	0.0926978	31.5316	7.30801	1.56674	0.179606	27.3	26.5	0.8	25.6857	0.742078	2.9304	2.73797	0.462797	4	3.33333	0.421637	79	69.5714	2.58067
	60 min	4h	68661	25.0564			532	408	512	152	127	145	1.19685	23.3083	71.4286	3.36842	1.14173	0.338952	5											26.1	25.7	0.4			1.53257			4			70
	60 min	4h	69179	32.3782			492	296	484	108	83	225	1.3012	39.8374	78.0488	4.48148	2.71084	0.604899	37.766											27.3	26	1.3			4.7619			2			71
	60 min	4h	66660	48.2173			539	433	527	187	117.6	336.3	1.59014	19.666	65.3061	2.81818	2.85969	1.01473	64.3235											25.3	24.6	0.7			2.7668			4			61
	60 min	4h	68575	25.8678			115	86	107	24	24	36	1	25.2174	79.1304	4.45833	1.5	0.336449	14.4578											24.7	24.4	0.3			1.21457			4			73
	60 min	4h	66668	29.3082			407.6	330.6	387.6	74	40.4	172.2	1.83168	18.8911	81.8449	5.23784	4.26238	0.813766	42.0281											21.9	21.4	0.5			2.28311			2			60
	60 min	4h	74937	41.4452			326	302	347	129	80	146	1.6125	7.36196	60.4294	2.68992	1.825	0.678458	30.2752											27.2	26.2	1			3.67647			*			73
	0 min	12h	65934	1.33303	0.225988	0.406553	*	*	*	*	*	*	*	*	*	*	*	*	*	41.9705	2.74577	86.8495	2.03938	1.10491	0.0433555	113.269	5.62446	1	0	24.8	23.9	0.9	25.3667	0.384419	3.62903	5.48353	1.0223	0	0	0	61	71.75	4.13068
	0 min	12h	80342	-0.26341			158	97	120	24	24	137	1	38.6076	84.8101	5	5.70833	1.14167	117.708											26.1	24.1	2			7.66284			0			76
	0 min	12h	80335	-0.487578			*	*	972	114	114	990	1	*	*	8.52632	8.68421	1.01852	102.098											25.2	23.9	1.3			5.15873			0			80
	0 min	12h	86785	0.321913			225	123	110	25	25	127	1	45.3333	88.8889	4.4	5.08	1.15455	120											*	*	*			*			0			70
	60 min	12h	66670	34.0303	35.0025	1.72842	306	265.9	329.6	69.3	33.7	137.8	2.05638	13.1046	77.3529	4.75613	4.08902	0.859736	39.9923	25.9298	6.49824	68.1159	3.04266	0.804482	0.0907463	35.8493	3.98519	2.04015	0.351572	26.1	24.1	2	24.34	0.644981	7.66284	5.30322	1.89704	3	2.8	0.860233	60	64.6	1.69312
	60 min	12h	65938	28.7479			199	127	194	77	26	52.3	2.96154	36.1809	61.3065	2.51948	2.01154	0.798394	22.4786											23.3	*	*			*			0			61
	60 min	12h	65866	38.6427			70	38	62	20	13.4	31	1.49254	45.7143	71.4286	3.1	2.31343	0.746269	41.9048											24.1	*	*			*			5			67
	60 min	12h	68671	36.8105			344.1	270	321.9	132	50.1	133.2	2.63473	21.5344	61.6391	2.43864	2.65868	1.09023	43.7599											22.4	20.9	1.5			6.69643			2			58
	60 min	12h	71689	36.7811			122	106	128	38	36	64	1.05556	13.1148	68.8525	3.36842	1.77778	0.527778	31.1111											25.8	25.4	0.4			1.55039			4			77
	0 min	24h	68568	-0.868936	-0.329312	0.87631	399	251	394	101	101	384	1	37.0927	74.6867	3.90099	3.80198	0.974619	96.587	45.2799	7.91716	77.9163	4.33968	1.01473	0.0206742	101.681	2.58788	1	0	21.7	*	*	25.3667	1.92209	*	9.40799	0.732685	0	0	0	58	80	11
	0 min	24h	77862	1.38458			736	459	843	202	202	865	1	37.6359	72.5543	4.17327	4.28218	1.0261	103.432											28.2	25.8	2.4			8.51064			0			91
	0 min	24h	77863	-1.50358			252	98	253	34	34	264	1	61.1111	86.5079	7.44118	7.76471	1.04348	105.023											26.2	23.5	2.7			10.3053			0			91
	60 min	24h	77869	29.9295	33.5382	2.30978	425	290	447	78	22	129	3.54545	31.7647	81.6471	5.73077	5.86364	1.02318	28.9973	32.2316	3.39245	80.6058	3.62515	0.897595	0.0618164	40.6806	6.83291	2.40069	0.454294	27.2	24.1	3.1	26.18	0.415532	11.3971	10.6397	0.483361	3	3	0	92	76.6	6.94262
	60 min	24h	77762	35.0467			534	362	485	70	24	156	2.91667	32.2097	86.8914	6.92857	6.5	0.938144	31.8072											27.4	24.5	2.9			10.5839			3			78
	60 min	24h	65343	26.5191			216	171	224	72	88.2	188	0.816327	20.8333	66.6667	3.11111	2.13152	0.685131	65.6579											25.7	22.8	2.9			11.284			3			61
	60 min	24h	77760	38.6246			488	283	336	70	28	113	2.5	42.0082	85.6557	4.8	4.03571	0.840774	31.9549											26.9	24.4	2.5			9.29368			3			78
	60 min	24h	66683	37.571			499.1	327.7	436	89	40	196.1	2.225	34.3418	82.1679	4.89888	4.9025	1.00074	44.9856											23.7	*	*						3			74
															NB: Green Denotes <70% MCAO drop
