# Supplementary material for: A Comparative Study of Variables Influencing Ischemic Injury in the Longa and Koizumi Methods of Intraluminal Filament Middle Cerebral Artery Occlusion in Mice
Source: PLoS One. 2016 Feb 12;11(2):e0148503. doi: 10.1371/journal.pone.0148503 (PMC4752454; doi:10.1371/journal.pone.0148503)
Supplement: S9 Table — (XLSX) [file pone.0148503.s011.xlsx]

## Sheet: Sheet1
Raw data for Figure 4
Thick suture timecourse 15, 30, 45, 60 min
Suture	Occlusion Time	Recovery Time	Mouse #	Lesion	Average Lesion	Std Error of the Mean	Pre CCA (Arbitrary Units)	Post CCA (Arbitrary Units)	Pre MCAO (Arbitrary Units)	Immediately Post MCAO (Arbitrary Units)	Immediately Pre Reperfusion (Arbitrary Units)	Last measured reperf at least 5 min Post Reperfusion (Arbitrary Units)	CBF Drop over time (Fold Change)	CCA Drop (%)	MCAO Drop vs. Pre CCA (%)	Ratio of MCAO drop	Ratio of Increase after MCA Reperfusion (5min post/Immediately pre reperfusion)	Reperfusion based on decreased and increased ratios	>5 min Reperfusion from initial MCAO drop (via the traditional % based method)	Average CCA Drop (%)	STD Error	Average MCAO Drop (%)	STD Error	Average MCA Reperfusion based on ratios	STD Error	Average MCA Reperfusion (Traditional Method) %	STD Error	Average CBF Drop Over Time (Ratio)	STD Error	Start Weight	End Weight	Weight Loss	Average Weight (Start)	STD Error	Average Weight Loss (% Original Body Weight)	Average Weight Loss (% Original Body Weight)	STD Error	Behaviour	Average Behaviour	STD Error	Age at Surgery (days)	Average Age at Surgery	STD Error
Thick	0 min	4h	70562	1.11732	0.674973	0.785098	*	*	301	66	66	321	1	*	*	4.56061	4.86364	1.06645	108.511	45.1951	2.23817	86.6698	2.03654	1.10615	0.0214552	113.06	2.68069	1	0	19.8	18.9	0.9	24.2333	2.22136	4.54545	4.66246	0.307278	0	0	0	81	80.3333	0.333333
			80344	-0.850954			859	490	621	132	132	708	1	42.9569	84.6333	4.70455	5.36364	1.1401	117.791											26.7	25.3	1.4			5.24345			0			80
			80345	1.75856			487	256	420	55	55	467	1	47.4333	88.7064	7.63636	8.49091	1.1119	112.877											26.2	25.1	1.1			4.19847			0			80
		24h	77864	0.727449	-0.186864	0.484716	215	167	185	42	42	203	1	22.3256	80.4651	4.40476	4.83333	1.0973	112.587	28.2652	5.99133	79.3086	1.75986	1.0403	0.0346596	105.081	4.50205	1	0	27.5	24.4	3.1	27.8667	0.688799	11.2727	11.3563	0.147891	0	0	0	91	91	0
			77865	-0.923077			261	203	261	48	48	273	1	22.2222	81.6092	5.4375	5.6875	1.04598	105.634											26.9	23.9	3			11.1524			0			91
			77568	-0.364964			323	193	313	78	78	306	1	40.2477	75.8514	4.01282	3.92308	0.977636	97.0213											29.2	25.8	3.4			11.6438			0			91
	15 min	4h	68588	3.86714	0.883138	1.179	124	86	128	35	36	65	0.972222	30.6452	71.7742	3.65714	1.80556	0.493707	31.1828	32.5555	3.31505	79.6558	2.1987	0.692453	0.082395	68.3778	11.1068	0.886138	0.094746	24.9	24.3	0.6	26.68	0.648588	2.40964	2.03042	0.231518	0	1.2	0.734847	73	73.8	1.61245
			70160	-0.3327			482	297	438	97	176	388	0.551136	38.3817	79.8755	4.51546	2.20455	0.488221	62.1701											27.8	27.1	0.7			2.51799			0			66
			70211	-0.878613			86	62	103	18	17	81	1.05882	27.907	79.0698	5.72222	4.76471	0.832667	75.2941											26.3	25.7	0.6			2.28137			3			68
			70212	-1.79538			509	387	484	84	104	502	0.807692	23.9686	83.4971	5.7619	4.82692	0.83773	99.5											26.5	26.1	0.4			1.50943			0			81
			70217	3.55524			640	372	559	102	98	435	1.04082	41.875	84.0625	5.48039	4.43878	0.809938	73.7418											27.9	27.5	0.4			1.43369			3			81
		24h	76640	-2.25677	2.33468	2.7426	362	257	369	63	73	438	0.863014	29.0055	82.5967	5.85714	6	1.02439	119.281	29.6808	4.7711	79.1081	2.47247	0.778491	0.108602	79.4565	18.5498	0.941654	0.0724372	27	25.1	1.9	26.86	0.335659	7.03704	10.0952	1.1098	1	0.75	0.478714	67	74.8	1.0328
			76646	33.2052			227	144	202	40	33	49.4	1.21212	36.5639	82.3789	5.05	1.49697	0.29643	10.1235											28.3	25.3	3			10.6007			1			71
			76648	-1.66972			61	45	56	17	21	61	0.809524	26.2295	72.1311	3.29412	2.90476	0.881803	102.564											27	23.8	3.2			11.8519			2			71
			76653	9.47879			234	186	244	49	43	144	1.13953	20.5128	79.0598	4.97959	3.34884	0.672512	51.7949											25.3	22.8	2.5			9.88142			0			73
			82460	3.78641			121	69	107	21	22	60	0.954545	42.9752	82.6446	5.09524	2.72727	0.535259	44.186											26.7	23.6	3.1			11.6105			0			92
	30 min	4h	69211	0.781435	7.67814	4.35503	409	287	329	132	53	387	2.49057	29.8289	67.7262	2.49242	7.30189	2.92963	169.543	25.4848	1.92759	78.4156	3.23386	1.36927	0.404168	87.2448	23.1821	1.73304	0.223124	24	23.4	0.6	25.08	0.42269	2.5	2.31916	0.206511	2	1.6	0.678233	71	71.8	1.61245
			68587	6.06644			151	105	154	29	25	131	1.16	30.4636	80.7947	5.31034	5.24	0.986753	84.8											25.8	25.2	0.6			2.32558			0			73
			70219	15.0518			125	96	110	20	13	54	1.53846	23.2	84	5.5	4.15385	0.755245	45.5556											24.4	23.8	0.6			2.45902			3			66
			70137	19.9534			533	419	480	80	42	205	1.90476	21.3884	84.9906	6	4.88095	0.813492	40.75											25.3	24.6	0.7			2.7668			3			68
			70216	-3.46237			173	134	157	44	28	136	1.57143	22.5434	74.5665	3.56818	4.85714	1.36124	95.5752											25.9	25.5	0.4			1.5444			0			81
		24h	76670	21.9479	21.4054	0.791976	299	216	306	40	34	157	1.17647	27.7592	86.6221	7.65	4.61765	0.603614	46.2406	29.6845	4.77365	82.8642	2.48051	1.02991	0.151415	82.6666	12.4546	1.26172	0.0736532	24.5	22.1	2.4	25.56	0.876736	9.79592	12.0216	1.56446	3	2.25	0.478714	67	73	1.80739
			76652	19.2343			440	338	430	106	92	419	1.15217	23.1818	75.9091	4.0566	4.55435	1.1227	100.926											28.4	23.7	4.7			16.5493			2			74
			76654	22.9919			341	192	249	59	40	222.4	1.475	43.695	82.6979	4.22034	5.56	1.31743	96											26.8	24.1	2.7			10.0746			1			74
			76656	2.91771			409	350	403	155	214	310	0.724299	14.4254	62.1027	2.6	1.4486	0.557153	38.7097											24.1	21	3.1			12.8631			1			79
			77870	21.4474			668	507	676	92	74	585	1.24324	24.1018	86.2275	7.34783	7.90541	1.07588	87.5											24	21.2	2.8			11.6667			3			71
	45 min	4h	68576	24.1355	24.5814	2.50984	209	197	259	59	33	141	1.78788	5.74163	71.7703	4.38983	4.27273	0.973324	54	23.52	5.92819	74.5417	1.91099	1.67636	0.487887	66.7055	15.6735	2.79548	0.709622	27.8	26.3	1.5	26.1	0.447214	5.39568	3.42274	0.522438	4	3.4	0.244949	73	72.8	1.54919
			70295	15.2383			123	77	115	33	15	116	2.2	37.3984	73.1707	3.48485	7.73333	2.21913	123.171											25.8	25	0.8			3.10078			3			67
			70411	25.7551			247	191	251	61	36	107	1.69444	22.6721	75.3036	4.11475	2.97222	0.722333	37.3684											26.8	26	0.8			2.98507			3			67
			70218	28.9362			893	747	928	260	47	560	5.53191	16.3494	70.8847	3.56923	11.9149	3.33822	76.7964											26.1	25.5	0.6			2.29885			3			81
			71728	28.842			570	368	470	105	38	192	2.76316	35.4386	81.5789	4.47619	5.05263	1.12878	42.1918											24	23.2	0.8			3.33333			4			76
		24h	77797	41.0321	39.0961	1.20303	168	116	147	34	9.6	53	3.54167	30.9524	79.7619	4.32353	5.52083	1.27693	38.4071	30.3511	3.6129	74.2263	2.4356	1.08663	0.223597	56.6593	18.7652	2.1111	0.402128	23.7	20.5	3.2	25.78	0.610464	13.5021	13.0179	0.567707	3	3.2	0.374166	73	77.8	1.0328
			77868	36.7725			210	120	200	70	42	204	1.66667	42.8571	66.6667	2.85714	4.85714	1.7	124.615											25.9	22.7	3.2			12.3552			4			77
			77885	41.326			219	165	262	56	35	154	1.6	24.6575	74.4292	4.67857	4.4	0.940458	57.767											26.2	22.9	3.3			12.5954			2			77
			77887	40.7369			708	486	664	149	113	171	1.31858	31.3559	78.9548	4.45638	1.51327	0.339575	11.2621											25.7	22.7	3			11.6732			4			77
			78156	35.6127			652	509	669	187	77	324	2.42857	21.9325	71.319	3.57754	4.20779	1.17617	51.2448											27.4	23.3	4.1			14.9635			3			85
	60 min	4h	65862	26.0338	39.6523	5.37465	171.9	142.9	184.5	32.5	16.9	63.4	1.92308	16.8703	81.0937	5.67692	3.75148	0.66083	30.5921	22.0497	3.76683	79.7572	3.81939	0.848293	0.0784624	40.4636	6.31376	2.34	0.433922	25.4	*	*	27.3429	0.622782	*	1.80665	0.0804963	1	3	1	66	75.2857	3.98569
			82492	51.4676			998	701	934	203	82	429	2.47561	29.7595	79.6593	4.60099	5.23171	1.13708	47.4692											29.4	28.8	0.6			2.04082			4			92
			74936	49.0539			263	232	286	48	10	44	4.8	11.7871	81.749	5.95833	4.4	0.738462	14.2857											25.5	25	0.5			1.96078			*			72
			74934	30.9257			604	554	621	254	132	372	1.92424	8.27815	57.947	2.44488	2.81818	1.15269	65.3951											27.2	26.7	0.5			1.83824			*			72
			74094	23.5514			172	122	137	29	13	46	2.23077	29.0698	83.1395	4.72414	3.53846	0.749017	30.5556											27.5	27	0.5			1.81818			*			67
			78005	60.8363			434	283	384	48.5	38	209	1.27632	34.7926	88.8249	7.91753	5.5	0.694661	50.9687											29.5	29	0.5			1.69492			4			86
			74935	35.6975			248	189	226	35	20	104	1.75	23.7903	85.8871	6.45714	5.2	0.80531	43.9791											26.9	26.5	0.4			1.48699			*			72
		24h	77736	43.0824	36.7644	2.01324	221	161	227	82	116	222	0.706897	27.1493	62.8959	2.76829	1.91379	0.691326	73.1034	25.5963	2.858	69.1363	7.15676	1.09627	0.239932	88.2805	19.7368	1.15461	0.131374	25.9	23.4	2.5	25.16	0.837854	9.65251	9.52496	1.00317	4	2.8	0.374166	79	77	1.0328
			77758	37.3312			464	325	502	256	190	282	1.34737	29.9569	44.8276	1.96094	1.48421	0.756888	37.3984											26.8	23.3	3.5			13.0597			3			79
			66677	33.6808			315.7	264.5	299.7	81.6	79.2	229.7	1.0303	16.2179	74.1527	3.67279	2.90025	0.789658	69.005											23.2	21.6	1.6			6.89655			3			75
			66630	38.3345			379.5	257.2	246.1	51	35.3	333.5	1.44476	32.2266	86.5613	4.82549	9.44759	1.95785	152.845											25.8	23.4	2.4			9.30233			2			77
			66676	31.3932			522.5	405.3	599.5	118.9	95.6	619.7	1.24372	22.4306	77.244	5.04205	6.48222	1.28563	109.051											24.1	22	2.1			8.71369			2			75
				NB: Red denotes lesion volume outliers detected by modified thompson tau test											NB: Green denotes <70% MCAO drop
